# Supplementary material
Source: PubMed Central journal article supplement (PMC3406388)

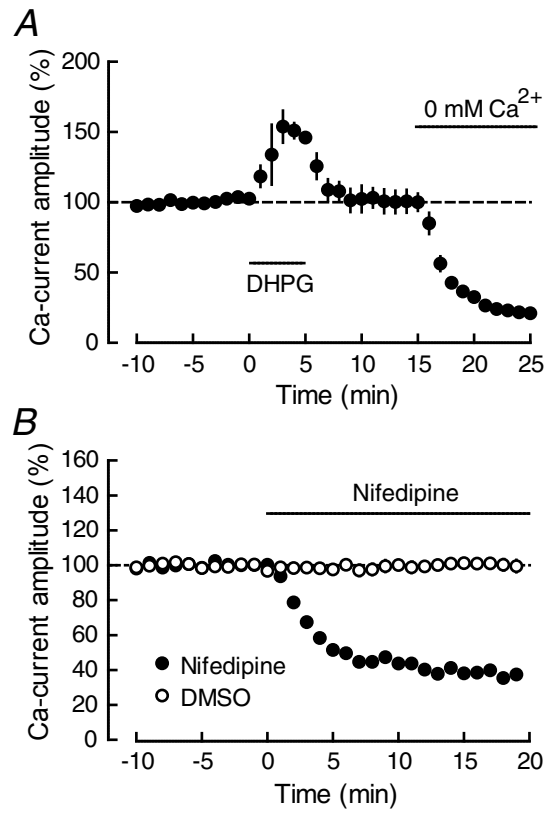

Supplementary Figure S1

Supplement: tjp0590-3019-SD1.pdf [file tjp0590-3019-SD1.pdf]
